# Supplementary material for: Predicting Persistent Fever in Patients with Cancer Receiving Antibiotics: A Machine Learning Approach
Source: Research Square preprint supplement (doi:10.21203/rs.3.rs-8699032/v1), 2026-02-13
Supplement: Supplementary file 1 [file 3f07971c2d1efdd234364d67.docx]

Supplemental Materials

Supplement to: Pucher G., Kanjilal S., Kopp K., et al. (2025): Predicting Persistent Fever in Patients with Cancer Receiving Antibiotics: A Machine Learning Approach.

Table of contents

[Supplemental Table 1. Data preprocessing steps 3](#_Toc219223723)

[Supplemental Table 2. Engineered features derived from the initial covariates. 3](#_Toc219223724)

[Supplemental Table 3. Comparison of AUC of models with and without using the forecasted fever value from the Chronos-2 forecasting model, based on 5-fold nested CV on the UME dataset. 5](#_Toc219223725)

[Supplemental Table 4. Hyperparameter search spaces for utilized machine learning models. 6](#_Toc219223726)

[Supplemental Table 5. Definition of antibiotic escalation strategies used for evaluation. 6](#_Toc219223727)

[Supplemental Table 6. Performance metric per model during 5-fold nested CV over 20 trials on the UME dataset. 6](#_Toc219223728)

[Supplemental Table 7. Performance metric per model during external validation on the BWH dataset. 7](#_Toc219223729)

[Supplemental Table 8. Top 10 features with highest SHAP values per model and dataset. 8](#_Toc219223730)

[Supplemental Table 9. Stratified discriminative performance per model during 5-fold nested CV over 20 trials on the UME dataset. 9](#_Toc219223731)

[Supplemental Table 10. Stratified discriminative performance per model during external validation on the BWH dataset. 10](#_Toc219223732)

[Supplemental Table 11. Discriminative performance per model during 5-fold nested CV over 20 trials on the UME dataset and external validation on the BWH dataset under an adapted fever definition threshold of 38.3 °C. 10](#_Toc219223733)

[Supplemental File 1. Tripod+AI Checklist. 12](#_Toc219223952)

Supplemental Table 1. Data preprocessing steps

| **Processing step** | **Description** |
| --- | --- |
| Measurement errors | **Body temperature:** Remove data points where or |
| **Heart rate:** Remove data points where or |
| **Mean arterial pressure:** Remove data points where or |
| **Hemoglobin:** Remove data points where or |
| **Serum Creatinine:** Remove data points where or |
| **Pulse Oximetry SpO₂:** Remove data points where or |
| **Bilirubin:** Remove data points where or |
| **Leukocytes:** Remove data points where or |
| **C-reactive Protein:** Remove data points where or |
| Duplicates | Remove redundant records where patient identifier, recorded time and recorded value are identical |
| Missing values | Forward-filling of the last observed values within the context window (​); remove time series if no values are included in the prediction window (​) |
| Scaling | Standard scaling of numerical covariates |
| Categorical values | One-hot encoding of categorical covariates |

Supplemental Table 2. Engineered features derived from the initial covariates.

| **Feature** | **Description** | **Datatype** |
| --- | --- | --- |
| cond_hemat | One-hot encoded ICD-10 code for admission diagnosis of other hematological malignancies | boolean |
| cond_leuk | One-hot encoded ICD-10 code for admission diagnosis of leukemia | boolean |
| cond_solid | One-hot encoded ICD-10 code for admission diagnosis of solid tumors | boolean |
| age | Age of patient at admission | integer |
| elixhauser_score | Elixhauser comorbidity score based on ICD-10 codes prior to admission | float |
| sex_male | One-hot encoded if sex of patient is male | boolean |
| length_stay | Length of days from start of hospital stay to first administered antibiotic dosage | float |
| time_lag_1_bt_max | Highest recorded body temperature (°C) 24-48 hours after first administered antibiotic dosage | float |
| time_lag_2_bt_max | Highest recorded body temperature (°C) 0-24 hours after first administered antibiotic dosage | float |
| time_lag_1_bt_mean | Mean recorded body temperature (°C) 24-48 hours after first administered antibiotic dosage | float |
| time_lag_2_bt_mean | Mean recorded body temperature (°C) 0-24 hours after first administered antibiotic dosage | float |
| time_lag_1_krea_max | Highest recorded serum creatinine (mg/dl) 24-48 hours after first administered antibiotic dosage | float |
| time_lag_2_krea_max | Highest recorded serum creatinine (mg/dl) 0-24 hours after first administered antibiotic dosage | float |
| time_lag_1_bili_max | Highest recorded bilirubin (mg/dl) 24-48 hours after first administered antibiotic dosage | float |
| time_lag_2_bili_max | Highest recorded bilirubin (mg/dl) 0-24 hours after first administered antibiotic dosage | float |
| time_lag_1_leua_max | Highest recorded leucocytes (nl) 24-48 hours after first administered antibiotic dosage | float |
| time_lag_2_leua_max | Highest recorded leucocytes (nl) 0-24 hours after first administered antibiotic dosage | float |
| time_lag_1_hb_max  v | Highest recorded hemoglobin (g/dl) 24-48 hours after first administered antibiotic dosage | float |
| time_lag_2_hb_max | Highest recorded hemoglobin (g/dl) 0-24 hours after first administered antibiotic dosage | float |
| time_lag_1_crp_max | Highest recorded CRP (mg/dl) 24-48 hours after first administered antibiotic dosage | float |
| time_lag_2_crp_max | Highest recorded CRP (mg/dl) 0-24 hours after first administered antibiotic dosage | float |
| time_lag_1_hr_max | Highest recorded heart rate (bpm) 24-48 hours after first administered antibiotic dosage | float |
| time_lag_2_hr_max | Highest recorded heart rate (bpm) 0-24 hours after first administered antibiotic dosage | float |
| time_lag_1_map_max | Highest recorded mean arterial pressure (mmHg) 24-48 hours after first administered antibiotic dosage | float |
| time_lag_2_map_max | Highest recorded mean arterial pressure (mmHg) 0-24 hours after first administered antibiotic dosage | float |
| time_lag_1_so2_max | Highest recorded SO2 (%) 24-48 hours after first administered antibiotic dosage | float |
| time_lag_2_so2_max | Highest recorded SO2 (%) 0-24 hours after first administered antibiotic dosage | float |
| fever_variability_lag_1 | Body temperature variability 24-48 hours after first administered antibiotic dosage | float |
| fever_variability_lag_2 | Body temperature variability 0-24 hours after first administered antibiotic dosage | float |
| last_bt_fever_lag_1 | Last body temperature measurement before prediction window | float |
| fever_diff_lag_1 | Difference in body temperature from first to last measured value 24-48 hours after first administered antibiotic dosage | float |
| fever_diff_lag_2 | Difference in body temperature from first to last measured value 0-24 hours after first administered antibiotic dosage | float |
| fever_percent_lag_1 | Percentage of measured body temperatures over fever threshold 24-48 hours after first administered antibiotic dosage | float |
| fever_percent_lag_2 | Percentage of measured body temperatures over fever threshold 0-24 hours after first administered antibiotic dosage | float |
| fever_lag_1_evening | Highest recorded body temperature (°C) during evening hours 24-48 hours after first administered antibiotic dosage | float |
| fever_lag_1_afternoon | Highest recorded body temperature (°C) during afternoon hours 24-48 hours after first administered antibiotic dosage | float |
| fever_lag_1_morning | Highest recorded body temperature (°C) during morning hours 24-48 hours after first administered antibiotic dosage | float |
| fever_lag_2_night | Highest recorded body temperature (°C) during night hours 24-48 hours after first administered antibiotic dosage | float |
| fever_lag_2_evening | Highest recorded body temperature (°C) during evening hours 0-24 hours after first administered antibiotic dosage | float |
| fever_lag_2_afternoon | Highest recorded body temperature (°C) during afternoon hours 0-24 hours after first administered antibiotic dosage | float |
| fever_lag_2_morning | Highest recorded body temperature (°C) during morning hours 0-24 hours after first administered antibiotic dosage | float |
| fever_lag_2_night | Highest recorded body temperature (°C) during night hours 0-24 hours after first administered antibiotic dosage | float |
| fever_points_lag_1 | Number of body temperature recordings 24-48 hours after first administered antibiotic dosage | integer |
| fever_points_lag_2 | Number of body temperature recordings 0-24 hours after first administered antibiotic dosage | integer |
| fever_change_lag_1 | Change rate of measured body temperatures 24-48 hours after first administered antibiotic dosage | float |
| fever_change_lag_all | Change rate of measured body temperatures 0-48 hours after first administered antibiotic dosage | float |
| fever_range_lag_1 | Range of measured body temperatures 24-48 hours after first administered antibiotic dosage | float |
| fever_range_lag_2 | Range of measured body temperatures 0-24 hours after first administered antibiotic dosage | float |
| trend | Trend of measured body temperatures 0-48 hours after first administered antibiotic dosage | float |
| skewness_lag_all | Skewness of measured body temperatures 0-48 hours after first administered antibiotic dosage | float |
| fourier_max_magnitude | Maximum fourier transform magnitude of body temperatures 0-48 hours after first administered antibiotic dosage | float |
| predictions_fever_max_we | Chronos-2 based forecasted highest body temperature 48-72 hours after first administered antibiotic dosage | float |

Supplemental Table 3. Comparison of AUC of models with and without using the forecasted fever value from the Chronos-2 forecasting model, based on 5-fold nested CV on the UME dataset. UME= University Medicine Essen; GLM = Generalized linear model; LR = Regularized logistic regression; RF = Random Forest; XGB = XGBoost; CB = CatBoost; TPFN = TabPFN.

| **Model** | **AUC95% CI** |
| --- | --- |
| GLM | 0.72 (CI 0.69-0.74) |
| GLM+Chronos-2 | 0.73 (CI 0.70-0.76) |
| LR | 0.73 (CI 0.70-0.76) |
| LR+Chronos-2 | 0.76 (CI 0.73-0.78) |
| RF | 0.74 (CI 0.71-0.77) |
| RF+Chronos-2 | 0.76 (CI 0.74-0.79) |
| CB | 0.77 (CI 0.74-0.80) |
| CB+Chronos-2 | 0.79 (CI 0.76-0.82) |
| XGB | 0.77 (CI 0.74-0.80) |
| XGB+Chronos-2 | 0.80 (CI 0.77-0.82) |
| TPFN | 0.79 (CI 0.76-0.81) |
| TPFN+Chronos-2 | 0.82 (CI 0.79-0.84) |
| Chronos-2 | 0.74 (CI 0.71-0.77) |

Supplemental Table 4. Hyperparameter search spaces for utilized machine learning models.

| Model | Hyperparameter | Range |
| --- | --- | --- |
| Logistic Regression | C | {10-4, ..., 10} (log scale) |
|  | penalty | [l1, l2, elasticnet] (categorical) |
|  | l1_ratio | {0, ..., 1} (uniform) |
| Random Forest | n_estimators | {100, ..., 500} (integer) |
|  | max_depth | {5, ..., 20} (integer) |
|  | min_samples_split | {2, ..., 20} (integer) |
|  | min_samples_leaf | {2, ..., 12} (integer) |
|  | max_features | [sqrt, log2, None] (categorical) |
|  | bootstrap | [True, False] (categorical) |
| XGBoost | subsample | {0.5, ..., 1.0} (uniform) |
|  | colsample_bytree | {0.5, ..., 1.0} (uniform) |
|  | reg_alpha | {1e-6, …, 10} (log scale) |
|  | reg_lambda | {1e-6, …, 10} (log scale) |
|  | max_depth | {3, ..., 8} (integer) |
|  | learning_rate | {0.01, …, 0.3} (log scale) |
|  | n_estimators | {500, ..., 1000} (integer) |
|  | min_child_weight | {1, ..., 10} (integer) |
|  | gamma | {0, ..., 5} (uniform) |
| CatBoost | depth | {3, ..., 7} (integer) |
|  | iterations | {1000, ..., 2000} (integer) |
|  | learning_rate | {0.05, …, 0.2} (log scale) |
|  | l2_leaf_reg | {1e-2, …, 20} (log scale) |
|  | bagging_temperature | {0.0, …, 5.0} (uniform) |
|  | random_strength | {0.0, …, 2.0} (uniform) |
|  | border_count | {32, ..., 255} (integer) |

Supplemental Table 5. Definition of antibiotic escalation strategies used for evaluation.

| After initiation of antibiotic therapy | ATC Code | Classification |
| --- | --- | --- |
| Addition of: | J01F | Macrolides, lincosamides and streptogramins |
|  | J01G | Aminoglycoside antibacterials |
|  | J01M | Quinolone antibacterials |
|  | J01XA | Glycopeptide antibacterials |
|  | J01XX08 | Linezolid |
| Switch to: | J01DH | Carbapenems |

Supplemental Table 6. Performance metric per model during 5-fold nested CV over 20 trials on the UME dataset. UME = University Medicine Essen; GLM = Generalized linear model; LR = Regularized logistic regression; RF = Random Forest; XGB = XGBoost; CB = CatBoost; TPFN = TabPFN.

| Metric | Naive | GLM | LR | RF | XGB | CB | TPFN |
| --- | --- | --- | --- | --- | --- | --- | --- |
| **Discrimination** |  |  |  |  |  |  |  |
| AUROC (95% CI) | 0.66 (0.62-0.69) | 0.73 (0.70-0.76) | 0.76 (0.73-0.78) | 0.76 (0.74-0.79) | 0.80 (0.77-0.82) | 0.79 (0.76-0.82) | 0.82 (0.79-  0.84) |
| AUPRC (95% CI) | 0.68 (0.64-0.73) | 0.76 (0.72-0.80) | 0.79 (0.75-0.82) | 0.78 (0.74-0.81) | 0.81 (0.77-0.84) | 0.81 (0.85-0.78) | 0.84 (0.81-0.87) |
| **Calibration** |  |  |  |  |  |  |  |
| Calibration intercept (95% CI) | 0.50 (0.34-0.66) | 0.14 (0.00-0.27) | 0.17 (0.03-0.30) | -0.01  (-0.16-0.13) | 0.00 (-0.15--0.15) | -0.05  (-0.20-0.09) | -0.08 (-0.23--0.07) |
| Calibration slope (95% CI) | 0.86 (0.65-1.08) | 0.69 (0.58-0.82) | 1.23 (1.04-1.45) | 0.86 (0.74-0.99) | 1.02 (0.90-1.17) | 0.97  (0.85-1.10) | 0.96 (0.86-1.08) |
| Brier score (95% CI) | 0.25 (0.24-0.26) | 0.21 (CI 0.20- 0.23) | 0.20 (0.19-0.21) | 0.20 (0.19-0.21) | 0.18 (0.17-0.20) | 0.19 (0.17-0.20) | 0.17 (0.16-0.18) |
| **Threshold-based metrics** |  |  |  |  |  |  |  |
| Sensitivity (95% CI) | 0.37 (0.33-0.41) | 0.63 (0.59-0.67) | 0.69 (0.65-0.72) | 0.66 (0.62-0.70) | 0.70 (0.66-0.73) | 0.70 (0.66-0.73) | 0.70 (0.65-0.73) |
| Specificity (95% CI) | 0.81  (0.78-0.85) | 0.70 (0.66-0.74) | 0.74 (0.70-0.78) | 0.71 (0.67-0.75) | 0.75 (0.71-0.79) | 0.76 (0.72-0.80) | 0.77 (0.74-0.81) |
| PPV (95% CI) | 0.70 (0.65-0.75) | 0.70 (0.65-0.75) | 0.76 (0.72-0.80) | 0.73 (0.69-0.77) | 0.76 (0.73-0.80) | 0.77 (0.73-0.81) | 0.79 (0.74-0.82) |
| NPV (95% CI) | 0.52 (0.49-0.56) | 0.52 (0.49-0.56) | 0.67 (0.63-0.71) | 0.64 (0.60-0.68) | 0.68 (0.64-0.72) | 0.68 (0.64-0.72) | 0.68 (0.64-0.72) |
| F1 score (95% CI) | 0.49 (0.44-0.53) | 0.68 (0.65-0.71) | 0.72 (0.69-0.75) | 0.69 (0.66-0.72) | 0.73 (0.70-0.76) | 0.73 (0.70-0.76) | 0.74 (0.70-0.77) |
| Accuracy (95% CI) | 0.63 (0.62-0.64) | 0.67 (0.64-0.70) | 0.71 (0.68-0.74) | 0.68 (0.65-0.71) | 0.72 (0.69-0.75) | 0.73 (0.70-0.75) | 0.74 (0.71-0.77) |

Supplemental Table 7. Performance metric per model during external validation on the BWH dataset. BWH = Brigham’s and Women Hospital; GLM = Generalized linear model; LR = Regularized logistic regression; RF = Random Forest; XGB = XGBoost; CB = CatBoost; TPFN = TabPFN.

| Metric | Naive | GLM | LR | RF | XGB | CB | TPFN |
| --- | --- | --- | --- | --- | --- | --- | --- |
| **Discrimination** |  |  |  |  |  |  |  |
| AUROC (95% CI) | 0.69 (0.68-0.70) | 0.71 (0.70-0.72) | 0.75 (0.74-0.76) | 0.75 (0.74-0.76) | 0.77 (0.76-0.78) | 0.77 (0.76-0.78) | 0.78 (0.77-  0.79) |
| AUPRC (95% CI) | 0.21 (CI 0.19-0.22) | 0.70 (0.68-0.72) | 0.72 (0.70-0.73) | 0.73 (0.71-0.74) | 0.76 (0.74-0.77) | 0.75 (0.74-0.77) | 0.76 (0.75-0.78) |
| **Calibration** |  |  |  |  |  |  |  |
| Calibration intercept (95% CI) | 3.28 (CI 2.99 – 3.55) | 0.20 (0.14-0.26) | -0.17 (-0.21--0.11) | -0.42  (-0.47--0.36) | -0.41 (-0.46--0.36) | -0.47  (-0.41--0.41) | -0.48 (-0.53--0.42) |
| Calibration slope (95% CI) | 1.90 (CI 1.75 – 2.06) | 0.34 (0.29-0.38) | 1.37 (1.23-1.49) | 0.86 (0.74-0.99) | 1.18 (1.12-1.24) | 1.26  (1.20-1.33) | 1.17 (1.11-1.23) |
| Brier score (95% CI) | 0.34 (CI 0.33 – 0.34) | 0.23 (CI 0.23- 0.24) | 0.21 (0.20-0.21) | 0.21 (0.21-0.22) | 0.20 (0.19-0.20) | 0.20 (0.20-0.21) | 0.20 (0.19-0.20) |
| **Threshold-based metrics** |  |  |  |  |  |  |  |
| Sensitivity (95% CI) | 0.33 (0.31-0.34) | 0.56 (0.54-0.57) | 0.66 (0.65-0.68) | 0.66 (0.64-0.67) | 0.68 (0.67-0.70) | 0.69 (0.67-0.70) | 0.69 (0.67-0.70) |
| Specificity (95% CI) | 0.88 (0.87-0.89) | 0.78 (0.77-0.79) | 0.72 (0.70-0.73) | 0.72 (0.70-0.73) | 0.74 (0.73-0.76) | 0.74 (0.73-0.76) | 0.76 (0.74-0.77) |
| PPV (95% CI) | 0.71 (0.69-0.73) | 0.69 (0.67-0.70) | 0.67 (0.66-0.69) | 0.67 (0.65-0.69) | 0.70 (0.68-0.71) | 0.70 (0.68-0.71) | 0.70 (0.69-0.72) |
| NPV (95% CI) | 0.60 (0.59-0.62) | 0.67 (0.66-0.68) | 0.71 (0.70-0.73) | 0.71 (0.69-0.72) | 0.73 (0.71-0.74) | 0.73 (0.72-0.74) | 0.73 (0.71-0.74) |
| F1 score (95% CI) | 0.45 (0.43-0.47) | 0.62 (0.60-0.63) | 0.67 (0.66-0.68) | 0.66 (0.65-0.68) | 0.69 (0.67-0.70) | 0.69 (0.68-0.70) | 0.70 (0.68-0.71) |
| Accuracy (95% CI) | 0.63 (0.62-0.64) | 0.68 (0.67-0.69) | 0.69 (0.68-0.70) | 0.69 (0.68-0.70) | 0.71 (0.70-0.72) | 0.71 (0.70-0.72) | 0.72 (0.71-0.73) |

Supplemental Table 8. Top 10 features with highest SHAP values per model and dataset. Rank agreement through mean Spearman rank correlation and Overlap through Jaccard Index, per dataset and across models and per model and across datasest; For feature descriptions, see Supplemental Table 2. UME = University Medicine Essen; BWH = Brigham’s and Women Hospital; GLM = Generalized linear model; LR = Regularized logistic regression; RF = Random Forest; XGB = XGBoost; CB = CatBoost; TPFN = TabPFN.

| Model | UME Top 10 SHAP Features | BWH Top 10 SHAP Features | Mean Spearman across datasets | Mean Jaccard across datasets |
| --- | --- | --- | --- | --- |
| GLM | fever_change_lag_1,5.04  fever_diff_lag_1,4.80  fourier_max_magnitude,1.62  fever_points_lag_2,1.30  fever_points_lag_1,0.91  predictions_fever_max_we,0.61  time_lag_1_bt_max,0.59  time_lag_1_bt_mean,0.53  fever_variability_lag_1,0.42  trend,0.32 | fourier_max_magnitude,6.19  fever_change_lag_1,4.62  fever_diff_lag_1,4.40  fever_points_lag_2,4.36  fever_points_lag_1,2.89  time_lag_1_bt_max,0.81  predictions_fever_max_we,0.57  time_lag_1_bt_mean,0.51  time_lag_1_krea_max,0.47  fever_variability_lag_1,0.45 | 0.93 | 0.82 |
| LR | predictions_fever_max_we,0.48  time_lag_1_bt_max,0.14  last_bt_fever_lag_1,0.12  time_lag_1_bt_mean,0.08  fever_lag_2_night,0.06  fever_range_lag_2,0.05  fever_percent_lag_1,0.04  time_lag_2_bt_max,0.04  cond_solid,0.03  fever_lag_2_evening,0.01 | predictions_fever_max_we,0.4  time_lag_1_bt_max,0.19  last_bt_fever_lag_1,0.10  time_lag_1_bt_mean,0.07  fever_lag_2_night,0.06  fever_range_lag_2,0.06  cond_solid,0.05  time_lag_2_bt_max,0.05  fever_percent_lag_1,0.05  fever_lag_2_evening,0.01 | 0.95 | 1.0 |
| RF | predictions_fever_max_we,0.12  time_lag_1_bt_mean,0.034  time_lag_1_bt_max,0.02  fever_lag_1_morning,0.02  fever_lag_2_evening,0.01  skewness_lag_all,0.01  fever_variability_lag_2,0.01  time_lag_1_crp_max,0.01  fourier_max_magnitude,0.01  time_lag_2_map_max,0.01 | predictions_fever_max_we,0.10  time_lag_1_bt_mean,0.05  time_lag_1_bt_max,0.02  fever_lag_1_morning,0.02  fever_lag_2_evening,0.01  skewness_lag_all,0.01  time_lag_2_map_max,0.01  fourier_max_magnitude,0.01  time_lag_2_bt_max,0.01  fever_variability_lag_2,0.01 | 0.85 | 0.82 |
| CB | predictions_fever_max_we,0.32  time_lag_1_bt_max,0.13  fever_lag_1_morning,0.09  trend,0.09  time_lag_1_bt_mean,0.09  last_bt_fever_lag_1,0.08  time_lag_2_bt_mean,0.07  fever_lag_2_night,0.06  time_lag_1_heart_rate_max,0.05  fever_percent_lag_1,0.05 | predictions_fever_max_we,0.30  time_lag_1_bt_max, 0.13  fever_lag_1_morning,0.09  time_lag_1_bt_mean,0.08  trend,0.08  fever_points_lag_1,0.08  last_bt_fever_lag_1,0.08  time_lag_2_bt_mean,0.07  time_lag_1_heart_rate_max,0.06  fever_percent_lag_1,0.06 | 0.83 | 0.82 |
| XGB | predictions_fever_max_we,0.11  time_lag_1_bt_max,0.06  time_lag_1_bt_mean,0.04  trend,0.02  fever_lag_1_morning,0.02  time_lag_2_bt_mean,0.02  time_lag_1_map_max,0.02  time_lag_1_heart_rate_max,0.01  time_lag_1_leua_max,0.01  fever_change_lag_1,0.01 | predictions_fever_max_we,0.10  time_lag_1_bt_max,0.07  time_lag_1_bt_mean,0.04  trend,0.03  time_lag_2_bt_mean,0.03  fever_lag_1_morning,0.02  time_lag_1_map_max,0.01  time_lag_1_heart_rate_max,0.01  fever_change_lag_1,0.01  time_lag_1_leua_max,0.01 | 0.98 | 0.82 |
| TPFN | predictions_fever_max_we,0.08  time_lag_1_bt_mean,0.03  time_lag_1_bt_max,0.02  last_bt_fever_lag_1,0.02  fever_percent_lag_1,0.01  trend,0.01  time_lag_2_bt_mean,0.01  fever_lag_1_morning,0.01  time_lag_2_bt_max,0.01  fever_lag_2_night,0.01 | predictions_fever_max_we,0.06  time_lag_1_bt_mean,0.03  time_lag_1_bt_max,0.02  last_bt_fever_lag_1,0.02  fever_percent_lag_1,0.02  fever_points_lag_1,0.01  fourier_max_magnitude,0.01  time_lag_2_bt_mean,0.01  time_lag_1_heart_rate_max,0.01  trend,0.01 | 0.66 | 0.54 |
| Mean Spearman across models | 0.40 | 0.42 |  | |
| Mean Jaccard across models | 0.36 | 0.35 |

Supplemental Table 9. Stratified discriminative performance per model during 5-fold nested CV over 20 trials on the UME dataset. UME = University Medicine Essen; GLM = Generalized linear model; LR = Regularized logistic regression; RF = Random Forest; XGB = XGBoost; CB = CatBoost; TPFN = TabPFN.

|  | AUROC (95% CI) | | | | | |
| --- | --- | --- | --- | --- | --- | --- |
|  | GLM | LR | RF | CB | XGB | TPFN |
| Female, n = 379 | 0.73 (0.68-0.78) | 0.74 (0.69-0.79) | 0.74 (0.69-0.79) | 0.78 (0.73-0.83) | 0.79 (0.74-0.84) | 0.82 (0.77-0.86) |
| Male, n = 608 | 0.75 (0.71-0.79) | 0.76 (0.72-0.80) | 0.77 (0.73-0.81) | 0.81 (0.77-0.84) | 0.81 (0.78-0.85) | 0.83 (0.80-0.86) |
| Age < 50, n = 310 | 0.80 (0.75-0.85) | 0.80 (0.75-0.85) | 0.79 (0.73-0.84) | 0.83 (0.78-0.88) | 0.84 (0.79-0.88) | 0.86 (0.82-0.90) |
| Age >= 50 & < 65, n = 380 | 0.72 (0.67-0.77) | 0.73 (0.68-0.78) | 0.76 (0.70-0.81) | 0.79 (0.74-0.84) | 0.79 (0.75-0.84) | 0.82 (0.77-0.86) |
| Age >= 65, n = 3,278 | 0.69 (0.63-0.75) | 0.70 (0.64-0.76) | 0.73 (0.68-0.79) | 0.77 (0.71-0.82) | 0.78 (0.73-0.83) | 0.79 (0.74-0.84) |
| Hemato. Malign., n = 503 | 0.74 (0.69-0.78) | 0.75 (0.71-0.79) | 0.76 (0.71-0.80) | 0.78 (0.74-0.82) | 0.79 (0.75-0.84) | 0.81 (0.78-0.85) |
| Leukemia, n = 310 | 0.73 (0.68-0.79) | 0.76 (0.70-0.81) | 0.77 (0.71-0.82) | 0.81 (0.77-0.86) | 0.82 (0.77-0.86) | 0.84 (0.79-0.88) |
| Solid tumor, n = 174 | 0.73 (0.65-0.80) | 0.73 (0.66-0.81) | 0.76 (0.69-0.82) | 0.81 (0.75-0.87) | 0.82 (0.76-0.88) | 0.84 (0.78-0.89) |

Supplemental Table 10. Stratified discriminative performance per model during external validation on the BWH dataset. BWH = Brigham’s and Women Hospital; GLM = Generalized linear model; LR = Regularized logistic regression; RF = Random Forest; XGB = XGBoost; CB = CatBoost; TPFN = TabPFN.

|  | AUROC (95% CI) | | | | | |
| --- | --- | --- | --- | --- | --- | --- |
|  | GLM | LR | RF | CB | XGB | TPFN |
| Female, n = 3,156 | 0.71 (0.70-0.73) | 0.75 (0.73-0.77) | 0.75 (0.73-0.77) | 0.77 (0.75-0.79) | 0.77 (0.75-0.78) | 0.78 (0.76-0.79) |
| Male, n = 4,253 | 0.71 (0.70-0.73) | 0.75 ( 0.74-0.77) | 0.75 (0.73-0.76) | 0.77 (0.76-0.79) | 0.77 (0.75-0.78) | 0.78 (0.77-0.79) |
| Age < 50, n = 1,478 | 0.73 (0.71-0.76) | 0.77 (0.75-0.79) | 0.77 (0.74-0.79) | 0.79 (0.76-0.81) | 0.79 (0.76-0.81) | 0.80 (0.78-0.82) |
| Age >= 50 & < 65, n = 2,653 | 0.71 (0.69-0.73) | 0.75 (0.73-0.77) | 0.74 (0.72-0.76) | 0.76 (0.74-0.78) | 0.76 (0.74-0.78) | 0.77 (0.75-0.78) |
| Age >= 65, n = 3,278 | 0.70 (0.68-0.72) | 0.75 (0.73-0.77) | 0.75 (0.73-0.76) | 0.77 (0.75-0.78) | 0.76 (0.74-0.78) | 0.77 (0.76-0.79) |
| Hemato. Malign., n = 1,436 | 0.70 (0.68-0.73) | 0.74 (0.71-0.76) | 0.75 (0.72-0.77) | 0.76 (0.74-0.79) | 0.75 (0.73-0.78) | 0.76 (0.74-0.79) |
| Leukemia, n = 1,764 | 0.73 (0.71-0.75) | 0.78 (0.76-0.80) | 0.78 (0.76-0.80) | 0.79 (0.77-0.81) | 0.79 (0.77-0.81) | 0.80 (0.78-0.82) |
| Solid tumor, n = 4,209 | 0.69 (0.67-0.71) | 0.74 (0.73-0.75) | 0.73 (0.71-0.74) | 0.75 (0.74-0.77) | 0.75 (0.74-0.77) | 0.76 (0.75-0.78) |

Supplemental Table 11. Discriminative performance per model during 5-fold nested CV over 20 trials on the UME dataset and external validation on the BWH dataset under an adapted fever definition threshold of 38.3 °C. UME = University Medicine Essen; BWH = Brigham’s and Women Hospital; GLM = Generalized linear model; LR = Regularized logistic regression; RF = Random Forest; XGB = XGBoost; CB = CatBoost; TPFN = TabPFN.

|  | University Medicine Essen (UME) | | | | | |
| --- | --- | --- | --- | --- | --- | --- |
|  | GLM | LR | RF | CB | XGB | TPFN |
| AUROC (95% CI) | 0.73 (0.70-0.76) | 0.77 (0.74-0.80) | 0.77 (0.74-0.80) | 0.80 (0.77-0.82) | 0.80 (0.77-0.82) | 0.80 (0.77-  0.83) |
|  | Brigham’s and Women Hospital (BWH) | | | | | |
|  | GLM | LR | RF | CB | XGB | TPFN |
| AUROC (95% CI) | 0.73 (0.72-0.74) | 0.77 (0.76-0.78) | 0.76 (0.75-0.77) | 0.78 (0.77-0.79) | 0.78 (0.76-0.79) | 0.79 (0.78-  0.80) |


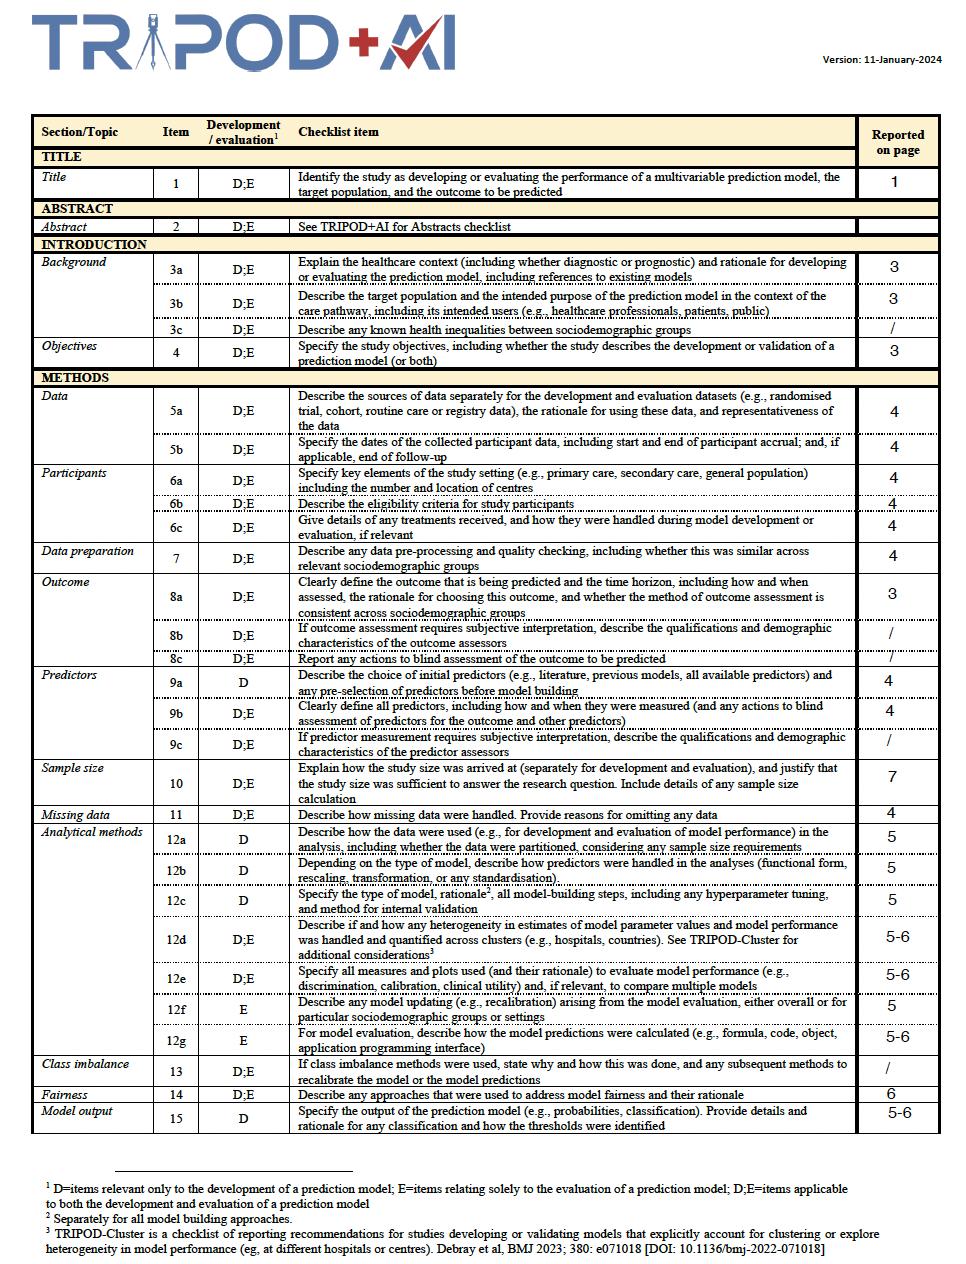


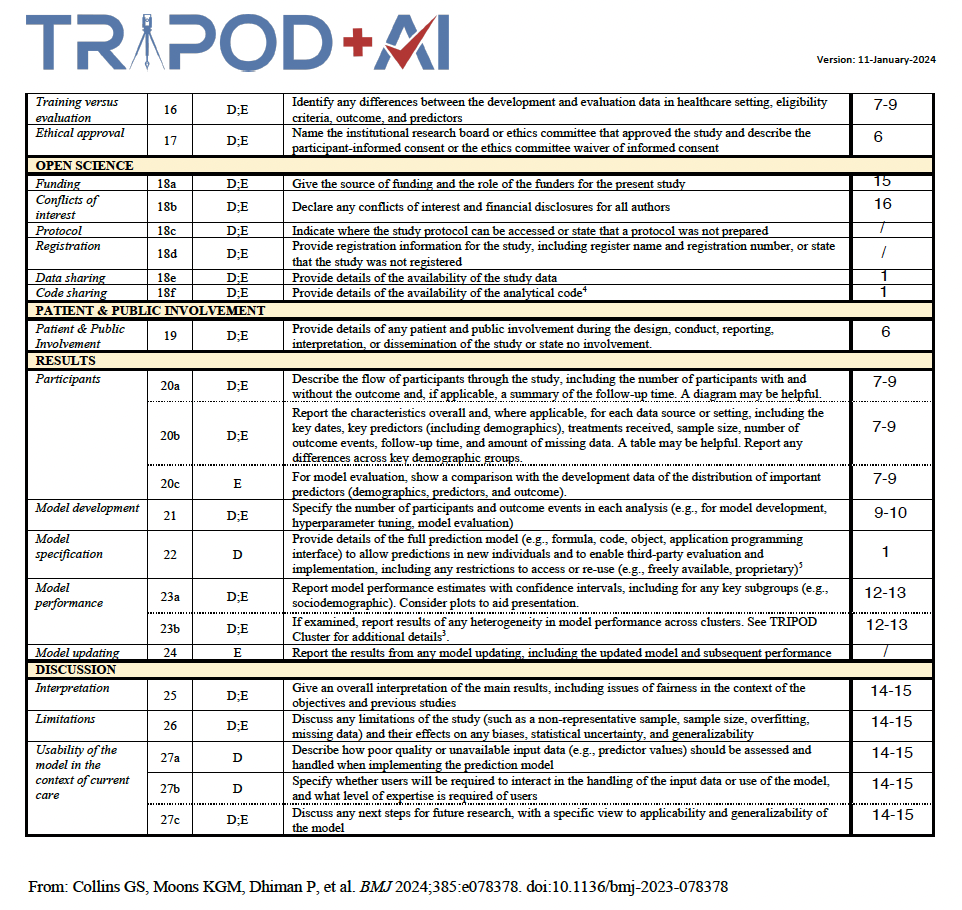


Supplemental File 1. Tripod+AI Checklist.
